# Supplementary material for: Correction: Identification of a serum-induced transcriptional signature associated with metastatic cervical cancer
Source: PLoS One. 2018 Feb 23;13(2):e0193687. doi: 10.1371/journal.pone.0193687 (PMC5825151; doi:10.1371/journal.pone.0193687)
Supplement: S1 Table — (XLSX) [file pone.0193687.s001.xlsx]

## Sheet: supplemental table 1
KEGG	Ngenes	Zscore			GO	Ngenes	Zscore
Staphylococcus aureus infection	48	6.99			response to interferon-alpha	6	13.29
Malaria	49	5.94			cellular response to lipoteichoic acid	7	12.28
Leishmaniasis	66	4.67			response to lipoteichoic acid	7	12.28
Phagosome	144	4.47			response to other organism	491	11.62
Osteoclast differentiation	126	4.35			positive regulation of macrophage chemotaxis	8	11.44
Toll-like receptor signaling pathway	99	4.29			macrophage chemotaxis	17	11.31
Amoebiasis	106	3.79			IgG binding	8	11.27
Rheumatoid arthritis	84	3.64			positive regulation of nitric-oxide synthase biosynthetic process	9	10.76
Chagas disease (American trypanosomiasis)	101	3.59			regulation of mononuclear cell migration	9	10.75
Cytokine-cytokine receptor interaction	254	3.41			innate immune response	477	10.54
Complement and coagulation cascades	67	3.37			response to molecule of bacterial origin	196	10.18
Systemic lupus erythematosus	107	3.18			regulation of vascular endothelial growth factor production	20	10.17
Hematopoietic cell lineage	84	3.17			vascular endothelial growth factor production	20	10.17
Pantothenate and CoA biosynthesis	16	2.87			regulation of macrophage chemotaxis	10	10.17
Chemokine signaling pathway	179	2.42			mononuclear cell migration	10	10.15
Sulfur metabolism	11	2.4			myeloid leukocyte cytokine production	13	9.96
Pathogenic Escherichia coli infection	54	2.28			response to lipopolysaccharide	184	9.79
Neuroactive ligand-receptor interaction	268	2.07			regulation of granulocyte chemotaxis	11	9.64
					granulocyte chemotaxis	11	9.64
					pancreatic ribonuclease activity	8	9.59
					cellular response to type I interferon	70	9.48
					type I interferon-mediated signaling pathway	70	9.48
					response to type I interferon	71	9.4
					maternal process involved in parturition	5	9.34
					response to bacterium	283	9.23
					regulation of nitric-oxide synthase biosynthetic process	12	9.2
					nitric-oxide synthase biosynthetic process	12	9.2
					chronic inflammatory response	17	9.18
					immunoglobulin binding	16	9.13
					response to progesterone stimulus	25	9.13
					inflammatory response	422	9.11
					response to virus	230	8.98
					regulation of mast cell degranulation	15	8.84
					sugar binding	192	8.84
					cytokine production	351	8.82
					positive regulation vascular endothelial growth factor production	16	8.71
					leukocyte chemotaxis	102	8.63
					positive regulation of mast cell activation	11	8.58
					regulation of mast cell activation involved in immune response	16	8.53
					pattern recognition receptor activity	14	8.52
					regulation of cytokine production	318	8.49
					leukocyte migration	225	8.46
					regulation of interleukin-6 production	59	8.34
					interleukin-6 production	61	8.17
					positive regulation of mast cell degranulation	9	8.13
					positive regulation of mast cell activation involved in immune response	9	8.13
					cellular response to lipopolysaccharide	70	8.12
					endoribonuclease activity, producing 3'-phosphomonoesters	11	8.05
					negative regulation of interleukin-12 production	7	8.01
					positive regulation of interleukin-6 production	31	8
					positive regulation of cGMP metabolic process	7	7.87
					mast cell degranulation	22	7.85
					cellular response to molecule of bacterial origin	74	7.84
					regulation of mast cell activation	23	7.83
					myeloid cell activation involved in immune response	41	7.82
					apoptotic cell clearance	16	7.77
					phagocytosis	80	7.74
					myeloid leukocyte activation	98	7.7
					positive regulation of leukocyte degranulation	10	7.68
					mast cell activation involved in immune response	23	7.65
					mast cell mediated immunity	23	7.65
					carbohydrate binding	380	7.65
					cell chemotaxis	126	7.57
					detection of molecule of bacterial origin	8	7.55
					regulation of leukocyte degranulation	20	7.53
					complement binding	8	7.47
					response to cytokine stimulus	462	7.45
					positive regulation of cytokine production	162	7.4
					purinergic receptor activity	33	7.4
					parturition	12	7.37
					chemokine activity	41	7.35
					regulation of myeloid leukocyte mediated immunity	21	7.32
					immune effector process	336	7.27
					cellular response to biotic stimulus	85	7.18
					regulation of interleukin-12 production	32	7.11
					glial cell migration	9	7.07
					mast cell activation	32	7.05
					regulation of macrophage cytokine production	9	7.03
					macrophage cytokine production	9	7.03
					cellular response to heat	19	7.01
					positive regulation of tumor necrosis factor biosynthetic process	9	7
					negative regulation of cytokine production	109	6.96
					brain segmentation	5	6.96
					central nervous system segmentation	5	6.96
					negative regulation of immune system process	146	6.95
					cytokine-mediated signaling pathway	301	6.95
					positive regulation of response to external stimulus	126	6.93
					interleukin-12 production	34	6.87
					cellular defense response	54	6.86
					regulation of tumor necrosis factor production	60	6.85
					tumor necrosis factor production	60	6.85
					endonuclease activity, active with either ribo- or deoxyribonucleic acids and producing 3'-phosphomonoesters	15	6.77
					negative regulation of viral reproduction	18	6.74
					negative regulation of viral genome replication	18	6.74
					tolerance induction	14	6.71
					microglial cell activation involved in immune response	5	6.67
					chemokine receptor binding	49	6.6
					tumor necrosis factor superfamily cytokine production	64	6.59
					negative regulation of fibrinolysis	10	6.57
					macrophage activation	36	6.56
					cellular response to cytokine stimulus	363	6.52
					N-formyl peptide receptor activity	6	6.51
					fibrinolysis	23	6.47
					positive regulation of immune system process	487	6.46
					positive regulation of hemostasis	19	6.46
					positive regulation of blood coagulation	19	6.46
					2'-deoxyribonucleotide biosynthetic process	6	6.45
					positive regulation of tumor necrosis factor production	29	6.43
					I-kappaB phosphorylation	11	6.29
					leukocyte degranulation	33	6.24
					response to temperature stimulus	105	6.22
					lipopolysaccharide-mediated signaling pathway	33	6.18
					positive regulation of leukocyte chemotaxis	47	6.17
					negative regulation of cytokine production involved in immune response	11	6.11
					negative regulation of production of molecular mediator of immune response	11	6.11
					cytokine production involved in immune response	40	6.04
					neutrophil chemotaxis	39	6.02
					regulation of chemokine production	42	6.01
					regulation of cell activation	329	6.01
					lipopolysaccharide binding	12	5.98
					regulation of antigen processing and presentation	11	5.96
					regulation of leukocyte migration	70	5.96
					chemokine production	43	5.93
					positive regulation of coagulation	22	5.92
					regulation of acetyl-CoA biosynthetic process from pyruvate	12	5.89
					acetyl-CoA biosynthetic process from pyruvate	12	5.89
					negative regulation of interleukin-6 production	13	5.87
					regulation of hemostasis	62	5.85
					regulation of blood coagulation	62	5.85
					regulation of cGMP metabolic process	12	5.83
					response to magnesium ion	12	5.81
					positive regulation of chemokine production	27	5.8
					rhombomere development	7	5.79
					negative regulation of leukocyte migration	12	5.79
					viral genome replication	41	5.77
					response to heat	68	5.75
					regulation of leukocyte activation	306	5.74
					regulation of leukocyte chemotaxis	53	5.7
					response to peptidoglycan	13	5.7
					positive regulation of myeloid leukocyte cytokine production involved in immune response	7	5.68
					lymphocyte chemotaxis	18	5.67
					negative regulation of cell activation	100	5.67
					positive regulation of leukocyte migration	54	5.63
					regulated secretory pathway	39	5.62
					positive regulation of multicellular organismal process	412	5.56
					positive regulation of NF-kappaB import into nucleus	21	5.53
					regulation of cytokine production involved in immune response	36	5.53
					positive regulation of immune effector process	90	5.52
					regulation of coagulation	68	5.49
					cell surface	430	5.48
					leukocyte activation	492	5.47
					positive regulation of interferon-beta production	15	5.46
					regulation of dendritic cell antigen processing and presentation	8	5.45
					dendritic cell antigen processing and presentation	8	5.45
					detection of biotic stimulus	23	5.45
					natural killer cell chemotaxis	7	5.44
					negative regulation of glycolysis	5	5.42
					regulation of fibrinolysis	14	5.41
					regulation of response to external stimulus	313	5.39
					myeloid leukocyte mediated immunity	41	5.38
					regulation of coenzyme metabolic process	14	5.38
					regulation of cofactor metabolic process	14	5.38
					regulation of viral genome replication	27	5.32
					cGMP-mediated signaling	14	5.29
					phagocytosis, engulfment	14	5.29
					positive regulation of tolerance induction	8	5.26
					regulation of tumor necrosis factor biosynthetic process	15	5.26
					tumor necrosis factor biosynthetic process	15	5.26
					regulation of wound healing	75	5.25
					response to exogenous dsRNA	15	5.23
					negative regulation of angiogenesis	52	5.19
					negative regulation of fibroblast growth factor receptor signaling pathway	9	5.16
					acetyl-CoA biosynthetic process	15	5.16
					deoxyribonucleotide biosynthetic process	9	5.13
					regulation of angiogenesis	138	5.1
					positive regulation of inflammatory response	61	5.09
					negative regulation of multicellular organismal process	301	5.01
